# Supplementary material
Source: Springer Nature journal article supplement (https://www.springermedizin.de/resource/supplementary/12889_2008_1491_MOESM10_ESM.pdf/9504408)
Supplement: MOESM10 [file 9504408]

### Overweight

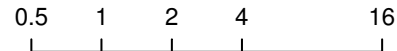

### Obese

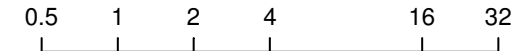

| Study                    | Obesity | Sex | Age   | F-up | Country | N     | Outcome | Risk Est (95% CI)  | Risk Est (95% CI)     |                       |
|--------------------------|---------|-----|-------|------|---------|-------|---------|--------------------|-----------------------|-----------------------|
| Wang (2005) [82]         | WC      | M   | 40-75 | 13   | US      | 27270 | IRR     | 2.77 (2.27 - 3.37) | 6.47 (5.51 - 7.60)    |                       |
| Meisinger (2006) [77]    | WC      | M   | 35-74 | 9.5  | Germany | 3055  | IRR     | 1.87 (1.29 - 2.71) | 4.67 (3.43 - 6.38)    |                       |
| Wang (2005) [82]         | WC      | M   | 40-75 | 13   | US      | 27270 | RR-P    | 2.72 (2.24 - 3.31) | 6.16 (5.26 - 7.21)    |                       |
| Meisinger (2006) [77]    | WC      | M   | 35-74 | 9.5  | Germany | 3055  | RR-P    | 1.81 (1.26 - 2.60) | 4.07 (3.02 - 5.48)    |                       |
| IRR: All studies (2)     |         |     |       |      |         |       |         | 3.3(0.07)*         | 2.36 (1.76 - 3.15)    | 5.67 (4.46 - 7.20)    |
| RR-P: All studies (2)    |         |     |       |      |         |       |         | 3.8(0.05)*         | 2.27 (1.67 - 3.10)    | 5.13 (3.81 - 6.90)    |
| Wannamethee (2005) [79]  | BMI     | M   | 40-59 | 17.6 | UK      | 7176  | IRR     | 2.69 (2.12 - 3.40) | 7.12 (5.40 - 9.40)    |                       |
| Koh-Banerjee (2004) [80] | BMI     | M   | 40-75 | 3.7  | US      | 22172 | IRR     | 2.63 (1.99 - 3.46) | 8.79 (6.34 - 12.19)   |                       |
| Meisinger (2006) [77]    | BMI     | M   | 35-74 | 9.5  | Germany | 3055  | IRR     | 2.20 (1.37 - 3.53) | 6.10 (3.84 - 9.69)    |                       |
| Oguma (2005) [81]        | BMI     | M   | 23.8  | 23.8 | US      | 20187 | IRR     | 2.19 (1.95 - 2.47) | 5.60 (4.51 - 6.97)    |                       |
| Wannamethee (2005) [79]  | BMI     | M   | 40-59 | 17.6 | UK      | 7176  | RR-P    | 2.63 (2.09 - 3.32) | 6.46 (4.97 - 8.40)    |                       |
| Meisinger (2006) [77]    | BMI     | M   | 35-74 | 9.5  | Germany | 3055  | RR-P    | 2.16 (1.36 - 3.43) | 5.53 (3.52 - 8.68)    |                       |
| Oguma (2005) [81]        | BMI     | M   | 23.8  | 23.8 | US      | 20187 | RR-P    | 2.11 (1.88 - 2.36) | 4.56 (3.74 - 5.56)    |                       |
| IRR: All studies (4)     |         |     |       |      |         |       |         | 3.2(0.37)*         | 2.40 (2.12 - 2.72)    | 6.74 (5.55 - 8.19)    |
| RR-P: All studies (3)    |         |     |       |      |         |       |         | 2.9(0.23)*         | 2.29 (1.98 - 2.64)    | 5.36 (4.32 - 6.65)    |
| IRR: F-up<10 yrs (2)     |         |     |       |      |         |       |         | 0.4(0.53)*         | 2.51 (1.98 - 3.19)    | 7.78 (5.96 - 10.16)   |
| IRR: F-up>=10 yrs (2)    |         |     |       |      |         |       |         | 2.3(0.13)*         | 2.28 (2.06 - 2.54)    | 6.14 (5.17 - 7.29)    |
| IRR: US studies (2)      |         |     |       |      |         |       |         | 1.4(0.24)*         | 2.34 (2.03 - 2.71)    | 6.84 (4.96 - 9.43)    |
| Carey (1997) [78]        | WC      | F   | 30-55 | 7.6  | US      | 42492 | IRR     | 4.85 (3.89 - 6.06) | 15.26 (12.43 - 18.72) |                       |
| Meisinger (2006) [77]    | WC      | F   | 35-74 | 9.5  | Germany | 2957  | IRR     | 2.99 (1.76 - 5.05) | 9.81 (6.23 - 15.43)   |                       |
| Folsom (2000) [19]       | WC      | F   | 55-69 | 9.4  | US      | 31702 | IRR     | 2.63 (2.12 - 3.26) | 8.88 (7.49 - 10.52)   |                       |
| Meisinger (2006) [77]    | WC      | F   | 35-74 | 9.5  | Germany | 2957  | RR-P    | 2.80 (1.67 - 4.70) | 8.39 (5.38 - 13.09)   |                       |
| IRR: All studies (3)     |         |     |       |      |         |       |         | 15.4(0)*           | 3.40 (2.42 - 4.78)    | 11.10 (8.23 - 14.96)  |
| RR-P: All studies (1)    |         |     |       |      |         |       |         |                    | 2.80 (1.67 - 4.70)    | 8.39 (5.38 - 13.09)   |
| Hu (2001) [75]           | BMI     | F   | 30-55 | 16   | US      | 84941 | IRR     | 5.47 (4.82 - 6.22) | 19.58 (17.37 - 22.06) |                       |
| Weinstein (2004) [76]    | BMI     | F   | 45+   | 6.9  | US      | 37878 | IRR     | 4.01 (3.37 - 4.78) | 13.47 (11.45 - 15.86) |                       |
| Folsom (2000) [19]       | BMI     | F   | 55-69 | 9.4  | US      | 31702 | IRR     | 3.27 (2.77 - 3.85) | 9.49 (8.09 - 11.14)   |                       |
| Meisinger (2006) [77]    | BMI     | F   | 35-74 | 9.5  | Germany | 2957  | IRR     | 3.26 (1.97 - 5.39) | 8.34 (5.37 - 12.97)   |                       |
| Weinstein (2004) [76]    | BMI     | F   | 45+   | 6.9  | US      | 37878 | RR-P    | 3.97 (3.34 - 4.72) | 12.83 (10.93 - 15.07) |                       |
| Meisinger (2006) [77]    | BMI     | F   | 35-74 | 9.5  | Germany | 2957  | RR-P    | 3.12 (1.90 - 5.11) | 7.41 (4.81 - 11.42)   |                       |
| IRR: All studies (4)     |         |     |       |      |         |       |         | 26.2(0)*           | 3.92 (3.10 - 4.97)    | 12.41 (9.03 - 17.06)  |
| RR-P: All studies (2)    |         |     |       |      |         |       |         | 0.8(0.37)*         | 3.64 (2.93 - 4.52)    | 10.47 (7.31 - 15.00)  |
| IRR: F-up<8 yrs (1)      |         |     |       |      |         |       |         |                    | 4.01 (3.37 - 4.78)    | 13.47 (11.45 - 15.86) |
| IRR: F-up>=8 yrs (3)     |         |     |       |      |         |       |         | 25.1(0)*           | 3.88 (2.84 - 5.28)    | 11.96 (7.79 - 18.37)  |
| IRR: US studies (3)      |         |     |       |      |         |       |         | 24.9(0)*           | 4.17 (3.24 - 5.37)    | 13.60 (9.70 - 19.07)  |

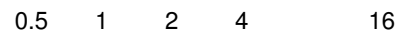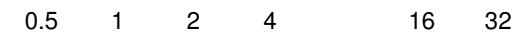

RR

RR
